# Supplementary material
Source: PubMed Central journal article supplement (PMC6160360)
Supplement: NIHMS955330-supplement-Supplemental.pdf [file NIHMS955330-supplement-Supplemental.pdf]

## Supplemental Materials

| Parameter                           | Formula                                                                               |
|-------------------------------------|---------------------------------------------------------------------------------------|
| hepatic artery coefficient (HAC)    | $[v_1(x_3-x_2)+v_2(x_1-x_3)+v_3(x_2-x_1)] / [a_1(v_2-v_3)+a_2(v_3-v_1)+a_3(v_1-v_2)]$ |
| portal vein coefficient (PVC)       | $[a_1(x_3-x_2)+a_2(x_1-x_3)+a_3(x_2-x_1)] / [a_1(v_3-v_2)+a_2(v_1-v_3)+a_3(v_2-v_1)]$ |
| arterial enhancement fraction (AEF) | $(x_2-x_1)/(x_3-x_1)$                                                                 |
| arterial phase enhancement          | $x_2-x_1$                                                                             |
| portal venous phase enhancement     | $x_3-x_1$                                                                             |

**Supplemental Table 1.** Enhancement and perfusion parameters for liver tumors (1, 2). HAC is an estimate of the hepatic artery blood supply; PVC is an estimate of the portal vein blood supply; and AEF is related to the arterial blood supply as a fraction of total blood supply.  $a_1$ ,  $a_2$ , and  $a_3$  are the average Hounsfield units in the hepatic artery in the non-contrast, arterial, and portal venous phases;  $v_1$ ,  $v_2$ , and  $v_3$  are the average Hounsfield units in the portal vein (near the bifurcation) in the non-contrast, arterial, and portal venous phases; and  $x_1$ ,  $x_2$ , and  $x_3$  are the average Hounsfield units in the target tumor in the non-contrast, arterial, and portal venous phases. Average Hounsfield units were measured in an elliptical regions of interest (ROI) on an axial slice. The tumor ROIs were drawn to cover as much of the tumor as possible, while avoiding large intratumoral blood vessels. The ROIs had the same size, shape, and anatomic location on each phase.

| Embolization particles                                                                             | Number of patients |
|----------------------------------------------------------------------------------------------------|--------------------|
| 40-120 $\mu$ m Embospheres                                                                         | 12                 |
| 40-120 $\mu$ m Embospheres, 90-180 $\mu$ m PVA foam                                                | 13                 |
| 40-120, 100-300 $\mu$ m Embospheres                                                                | 2                  |
| 40-120, 100-300 $\mu$ m Embospheres, 90-180 $\mu$ m PVA foam                                       | 3                  |
| 40-120, 100-300, 300-500 $\mu$ m Embospheres, 90-180 $\mu$ m PVA foam                              | 2                  |
| 100-300 $\mu$ m Embospheres                                                                        | 3                  |
| 100-300 $\mu$ m Bead Block                                                                         | 3                  |
| 100-300 $\mu$ m Embospheres, 90-180 $\mu$ m PVA foam                                               | 2                  |
| 100-300 $\mu$ m Bead Block, 90-180 $\mu$ m PVA foam                                                | 10                 |
| 100-300, 300-500 $\mu$ m Embospheres, 90-180 $\mu$ m PVA foam                                      | 1                  |
| 100-300, 300-500 $\mu$ m Embospheres, 90-180, 180-300, 500-710 $\mu$ m PVA foam                    | 1                  |
| 100-300, 300-500 $\mu$ m Bead Block, 90-180 $\mu$ m PVA foam                                       | 2                  |
| 100-300 $\mu$ m LC Beads + 150 mg doxorubicin                                                      | 3                  |
| 100-300 $\mu$ m LC Beads + 100 mg doxorubicin, 90-180 $\mu$ m PVA foam                             | 1                  |
| 100-300 $\mu$ m LC Beads + 150 mg doxorubicin, 100-300 $\mu$ m Bead Block, 90-180 $\mu$ m PVA foam | 1                  |
| Bland embolization, unknown particle size                                                          | 4                  |
| <b>Total</b>                                                                                       | <b>63</b>          |

**Supplemental Table 2.** Embolization particles used.

|                       |                       | # of patients | Complete response | Median OS |
|-----------------------|-----------------------|---------------|-------------------|-----------|
| Initial particle size | 40-120 $\mu\text{m}$  | 32            | 56%               | 42 months |
|                       | 100-300 $\mu\text{m}$ | 27            | 37%               | 29 months |
|                       | <i>p</i> value        |               | 0.19              | 0.76      |
| TAE vs. DEB-TACE      | TAE                   | 58            | 52%               | 32 months |
|                       | DEB-TACE              | 5             | 20%               | 22 months |
|                       | <i>p</i> value        |               | 0.35              | 0.11      |

**Supplemental Table 3.** Response and overall survival after embolization starting with 40-120  $\mu\text{m}$  versus 100-300  $\mu\text{m}$  spherical particles. A prior study (3) also showed no difference in response or overall survival with TAE compared to DEB-TACE.

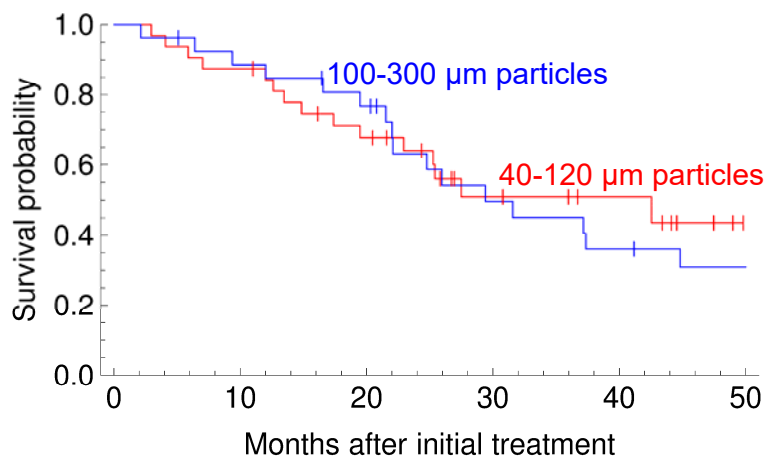

**Supplemental Figure 1.** Overall survival after embolization starting with 40-120  $\mu\text{m}$  (red) versus 100-300  $\mu\text{m}$  (blue) spherical particles.

## References

1. Boas FE, Brody LA, Erinjeri JP, et al. Quantitative Measurements of Enhancement on Preprocedure Triphasic CT Can Predict Response of Colorectal Liver Metastases to Radioembolization. *AJR Am J Roentgenol.* 2016; 207(3):671-5.
2. Boas FE, Kamaya A, Do B, et al. Classification of hypervascular liver lesions based on hepatic artery and portal vein blood supply coefficients calculated from triphasic CT scans. *Journal of digital imaging.* 2015; 28:213-23.
3. Brown KT, Do RK, Gonen M, et al. Randomized Trial of Hepatic Artery Embolization for Hepatocellular Carcinoma Using Doxorubicin-Eluting Microspheres Compared With Embolization With Microspheres Alone. *J Clin Oncol.* 2016; 34(17):2046-53.
